# Supplementary material
Source: PubMed Central journal article supplement (PMC2701959)
Supplement: supp_41_1_14__1.pdf [file supp_41_1_14__1.pdf]

# **Bcl-2 Family Proteins Contribute to Apoptotic Resistance in Lung Cancer Multicellular Spheroids**

Tsung-Ming Yang <sup>1,2,4</sup>, Dario Barbone <sup>2,4</sup>, Dean A. Fennell <sup>3</sup>, and V. Courtney Broaddus <sup>2,3</sup>

<sup>1</sup>Division of Pulmonary and Critical Care Medicine, Chang Gung Memorial Hospital, Chiayi, Taiwan;

<sup>2</sup>Lung Biology Center, San Francisco General Hospital; <sup>3</sup>Queen's University Belfast, Centre for Cancer Research and Cell Biology and Northern Ireland Cancer Centre, Belfast, Northern Ireland; and

<sup>4</sup>Comprehensive Cancer Center, University of California San Francisco, California

**Online Data Supplement**

**Figure E1. The expression of FLIPs increases in spheroids but does not interfere with TRAIL signaling or explain resistance of spheroids.**

**A) FLIP<sub>S</sub> is up-regulated after A549 cells form spheroids.** By immunoblot, FLIP<sub>S</sub> is upregulated in spheroids (S) compared to monolayers (M), at baseline and after exposure to bortezomib plus TRAIL. FLIP<sub>L</sub> is upregulated by bortezomib to the same degree in monolayers and spheroids at 4 h.

**B) FLIP<sub>S</sub> depletion did not reduce the apoptotic resistance of spheroids.** FLIP<sub>S</sub> was depleted by siRNA, as measured at 72 h after transfection, the time when agents were added (see top panel). The knockdown of FLIP<sub>S</sub> did not reduce the resistance of A549 spheroids to bortezomib (Bz) plus TRAIL. (\*different from monolayer; mean  $\pm$  SD, n=3, p < 0.01).

**A**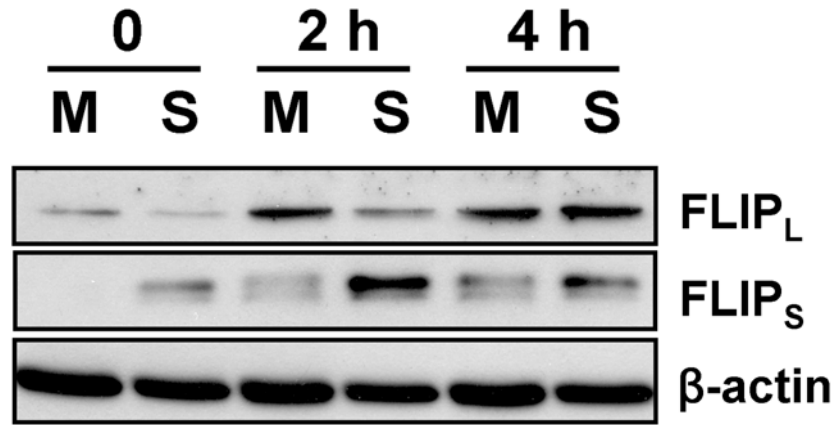**B**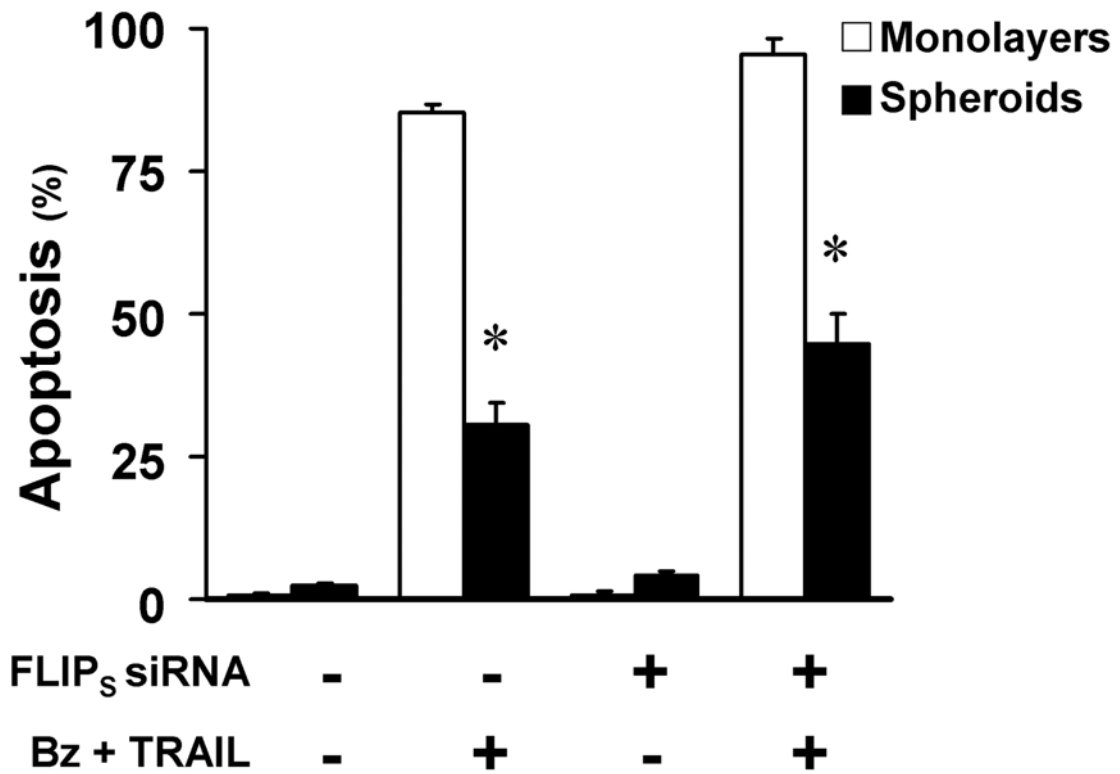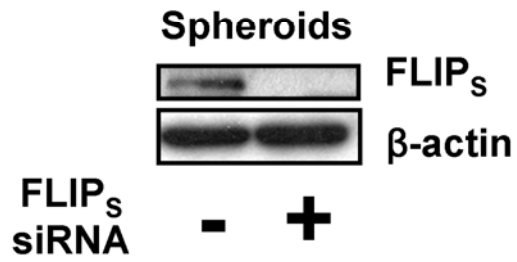

Figure E1
